# Supplementary material for: Cross-species multiple environmental stress responses: An integrated approach to identify candidate genes for multiple stress tolerance in sorghum (Sorghum bicolor (L.) Moench) and related model species
Source: PubMed Central journal article supplement (PMC5873934; doi:10.1371/journal.pone.0192678), 2018-03-28

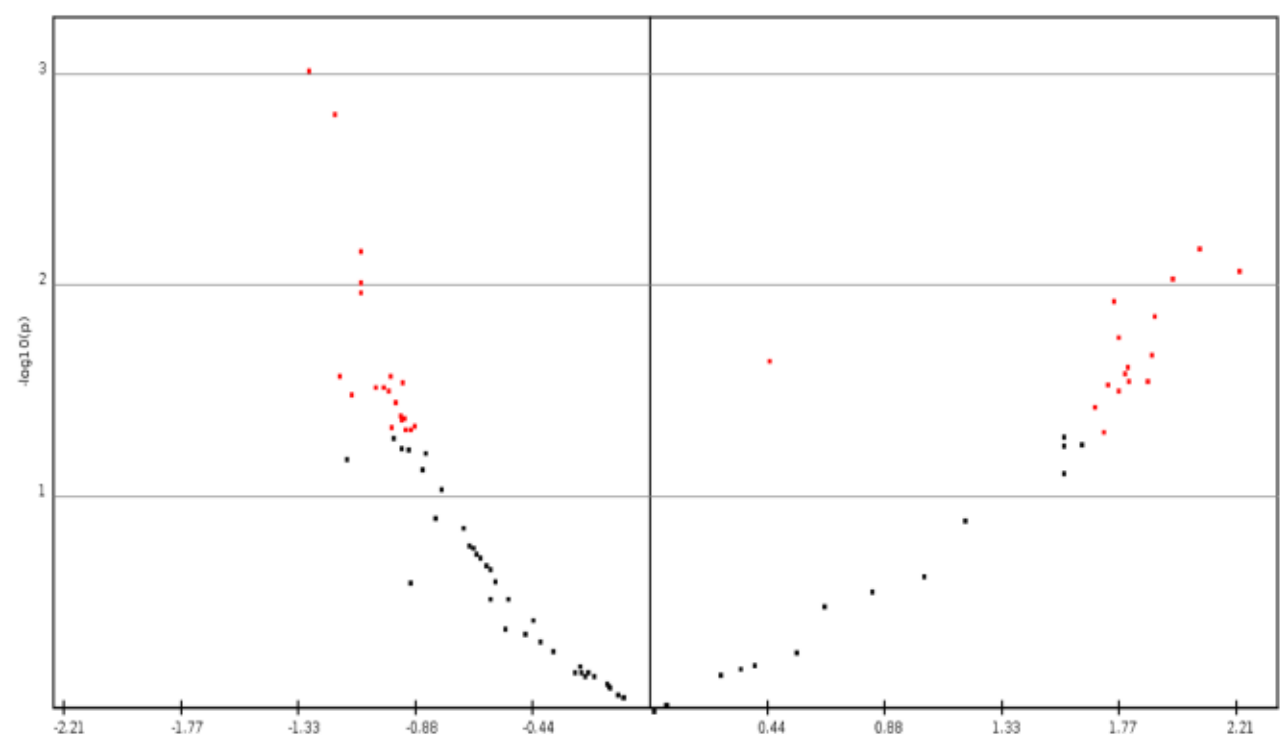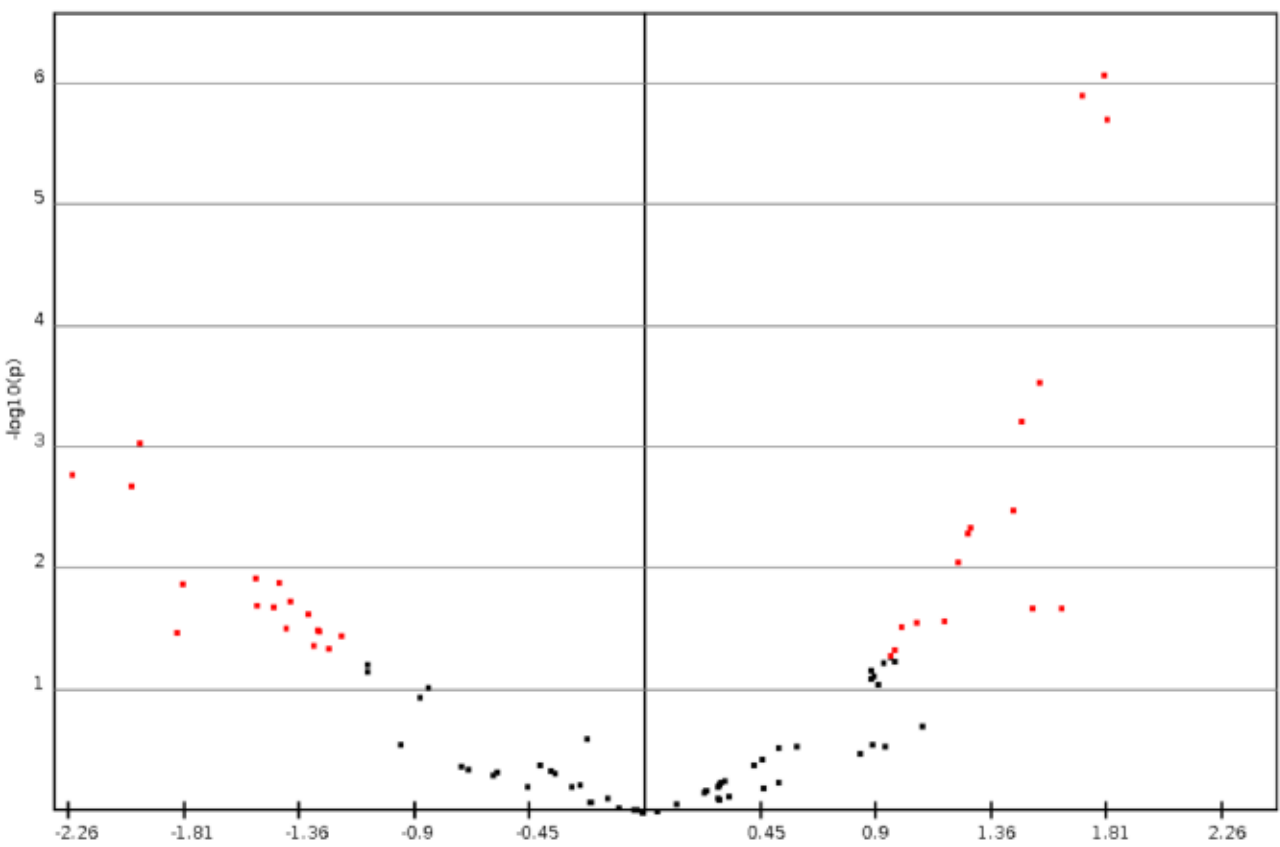

Supplement: pone.0192678.s001.pdf [file pone.0192678.s001.pdf]
